# Supplementary material for: Axonal plasticity underpins the functional recovery following surgical decompression in a rat model of cervical spondylotic myelopathy
Source: PubMed Central journal article supplement (PMC4994254; doi:10.1186/s40478-016-0359-7), 2016-08-23

Suppl. Figure 1

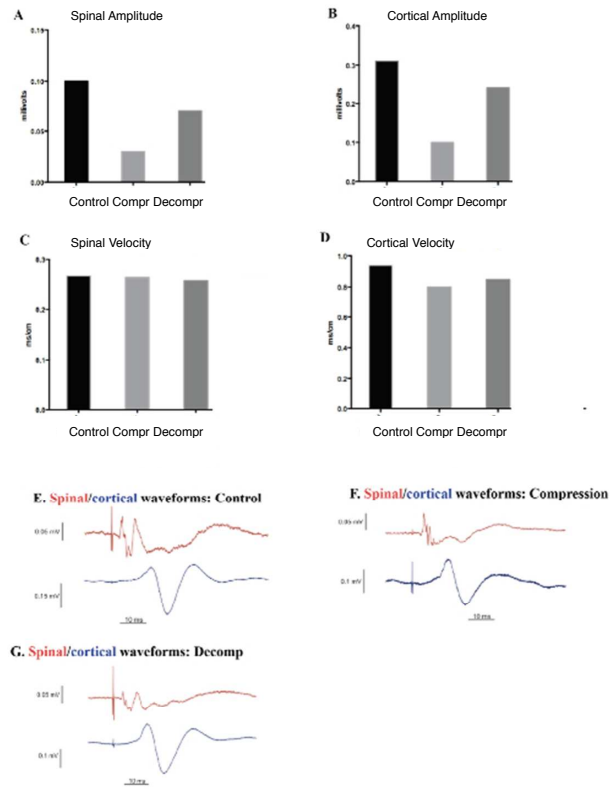

Supplement: 40478_2016_359_MOESM1_ESM.pdf [file 40478_2016_359_MOESM1_ESM.pdf]
